# Supplementary material for: A theoretical study of vibronic coupling in the photoelectron spectra of Al6N−
Source: Royal Society of Chemistry journal article supplement (doi:10.1039/d3cp00836c), 2023-01-01
Supplement: d3cp00836c1.pdf [file d3cp00836c1.pdf]

**Electronic Supporting Information for**  
**Theoretical Study of Vibronic Interactions in the Photoelectron**  
**Spectra of  $\text{Al}_6\text{N}^-$**

Rishabh Kumar Pandey<sup>1</sup>, Korutla Srikanth<sup>1</sup>, Anuj Tak<sup>1</sup>,  
Abhishek Kumar<sup>2</sup> and Tammineni Rajagopala Rao<sup>1</sup>

*Department of Chemistry, Indian Institute of  
Technology Patna, Bihta, Bihar, India 801106 and  
Indian Association for Cultivation of Science,  
Kolkata, West Bengal, India 700032\**

---

\* rajgopal@iitp.ac.in

Table S.I. Bond lengths for  $\text{Al}_6\text{N}$  (in Å unit) obtained using CAM-B3LYP, M06-2X and MP2 level of theories with a 6-311+g(d) basis set.

| Parameter                 | CAM-B3LYP | M06-2X | MP2     |
|---------------------------|-----------|--------|---------|
| $\text{N}_1\text{-Al}_2$  | 2.3529    | 2.3402 | 2.3514  |
| $\text{N}_1\text{-Al}_4$  | 1.9848    | 1.9869 | 1.9973  |
| $\text{N}_1\text{-Al}_3$  | 2.3543    | 2.3416 | 2.3527  |
| $\text{N}_1\text{-Al}_7$  | 1.9845    | 1.9865 | 1.9968  |
| $\text{Al}_2\text{-Al}_3$ | 2.5918    | 2.5717 | 2.6057  |
| $\text{Al}_4\text{-Al}_5$ | 2.9704    | 2.9644 | 2.9635  |
| $\text{Al}_4\text{-Al}_7$ | 2.5920    | 2.6055 | 2.6297  |
| $\text{Al}_3\text{-Al}_6$ | 2.6508    | 2.6414 | 2.66243 |

Table S.II. Quadratic and higher-order coupling parameters for  $\tilde{X}^2B_1$  state. The parameters are given in the eV unit.

| Vibrational mode frequencies | $E_0$  | $\gamma$ | $C$     |           |
|------------------------------|--------|----------|---------|-----------|
| $\nu_6 (a_2)$                | 0.0077 | 2.4260   | -0.0042 |           |
| $\nu_7 (a_2)$                | 0.0229 | 2.4248   | -0.0066 |           |
| $\nu_8 (a_2)$                | 0.0303 | 2.4250   | -0.0040 |           |
| $\nu_9 (b_1)$                | 0.0233 | 2.4265   | 0.0047  |           |
| $\nu_{10} (b_1)$             | 0.0337 | 2.4246   | -0.0064 |           |
| $\nu_{11} (b_1)$             | 0.0661 | 2.4261   | -0.0041 |           |
| $\nu_{12} (b_2)$             | 0.0098 | 2.4252   | -0.0095 | 0.00001   |
| $\nu_{13} (b_2)$             | 0.0132 | 2.4251   | -0.0042 |           |
| $\nu_{14} (b_2)$             | 0.0310 | 2.4251   | -0.0049 | 0.000004  |
| $\nu_{15} (b_2)$             | 0.0650 | 2.4251   | -0.0001 | -0.000002 |

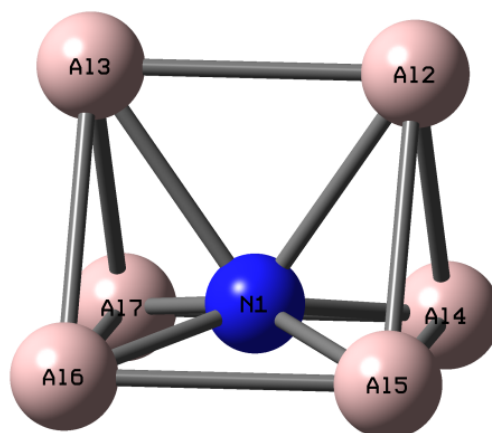

Figure S1. The optimized structure of neutral  $\text{Al}_6\text{N}$ .

Table S.III. Quadratic and higher-order coupling parameters for  $\tilde{A}^2A_1$  state. The parameters are given in the eV unit.

| Vibrational mode frequencies | $E_0$  | $\gamma$ | $C$     |        |
|------------------------------|--------|----------|---------|--------|
| $\nu_6 (a_2)$                | 0.0077 | 3.1676   | -0.0118 |        |
| $\nu_7 (a_2)$                | 0.0229 | 3.1682   | -0.0044 |        |
| $\nu_8 (a_2)$                | 0.0303 | 3.1678   | -0.0050 |        |
| $\nu_9 (b_1)$                | 0.0233 | 3.1671   | -0.0088 |        |
| $\nu_{10} (b_1)$             | 0.0337 | 3.1673   | -0.0046 |        |
| $\nu_{11} (b_1)$             | 0.0661 | 3.1649   | -0.0157 |        |
| $\nu_{12} (b_2)$             | 0.0098 | 3.1589   | -0.0673 | 0.0016 |
| $\nu_{13} (b_2)$             | 0.0132 | 3.1647   | -0.0454 | 0.0008 |
| $\nu_{14} (b_2)$             | 0.0310 | 3.1671   | -0.0223 | 0.0003 |
| $\nu_{15} (b_2)$             | 0.0650 | 3.1643   | -0.0569 | 0.0009 |

Table S.IV. Quadratic and higher-order coupling parameter for  $\tilde{B}^2B_2$  state. The parameters are given in the eV unit.

| Vibrational mode frequencies | $E_0$  | $\gamma$ |         |
|------------------------------|--------|----------|---------|
| $\nu_6 (a_2)$                | 0.0077 | 3.2787   | 0.0140  |
| $\nu_7 (a_2)$                | 0.0229 | 3.2784   | 0.0019  |
| $\nu_8 (a_2)$                | 0.0303 | 3.2782   | -0.0047 |
| $\nu_9 (b_1)$                | 0.0233 | 3.2780   | -0.0078 |
| $\nu_{10} (b_1)$             | 0.0337 | 3.2780   | -0.0016 |
| $\nu_{11} (b_1)$             | 0.0661 | 3.2776   | -0.0091 |
| $\nu_{12} (b_2)$             | 0.0098 | 3.2934   | 0.0642  |
| $\nu_{13} (b_2)$             | 0.0132 | 3.2840   | 0.0251  |
| $\nu_{14} (b_2)$             | 0.0310 | 3.2800   | 0.0122  |
| $\nu_{15} (b_2)$             | 0.0650 | 3.2808   | 0.0193  |

Table S.V. Quadratic and higher-order coupling parameters for  $\tilde{C}^2A_2$  state. The parameters are given in the eV unit.

| Vibrational mode frequencies | $E_0$  | $\gamma$ | $\delta$ | $C$     |
|------------------------------|--------|----------|----------|---------|
| $\nu_6 (a_2)$                | 0.0077 | 4.2158   | 0.0033   |         |
| $\nu_7 (a_2)$                | 0.0229 | 4.2123   | -0.0093  |         |
| $\nu_8 (a_2)$                | 0.0303 | 4.2151   | -0.0043  |         |
| $\nu_9 (b_1)$                | 0.0233 | 4.2147   | -0.0139  | 0.0001  |
| $\nu_{10} (b_1)$             | 0.0337 | 4.2153   | -0.0082  | 0.00002 |
| $\nu_{11} (b_1)$             | 0.0661 | 4.2142   | -0.0110  | 0.0001  |
| $\nu_{12} (b_2)$             | 0.0098 | 4.2154   | -0.0019  |         |
| $\nu_{13} (b_2)$             | 0.0132 | 4.2148   | -0.0072  |         |
| $\nu_{14} (b_2)$             | 0.0310 | 4.2152   | -0.0068  | 0.00003 |
| $\nu_{15} (b_2)$             | 0.0650 | 4.2019   | -0.0942  | 0.0014  |

Table S.VI. Quadratic and higher-order coupling parameters for  $\tilde{D}^2B_1$  state. The parameters are given in the eV unit.

| Vibrational mode frequencies | $E_0$  | $\gamma$       |
|------------------------------|--------|----------------|
| $\nu_6 (a_2)$                | 0.0077 | 4.2007 -0.0010 |
| $\nu_7 (a_2)$                | 0.0229 | 4.2005 -0.0009 |
| $\nu_8 (a_2)$                | 0.0303 | 4.1989 -0.0010 |
| $\nu_9 (b_1)$                | 0.0233 | 4.2008 0.0202  |
| $\nu_{10} (b_1)$             | 0.0337 | 4.2012 0.0077  |
| $\nu_{11} (b_1)$             | 0.0661 | 4.2035 0.0105  |
| $\nu_{12} (b_2)$             | 0.0098 | 4.2014 0.0013  |
| $\nu_{13} (b_2)$             | 0.0132 | 4.2009 0.0021  |
| $\nu_{14} (b_2)$             | 0.0310 | 4.2033 0.0168  |
| $\nu_{15} (b_2)$             | 0.0650 | 4.5246 0.0051  |

Table S.VII. Quadratic and higher-order coupling parameters for  $\tilde{E}^2A_1$  state. The parameters are given in the eV unit.

| Vibrational mode frequencies | $E_0$  | $\gamma$       |
|------------------------------|--------|----------------|
| $\nu_6 (a_2)$                | 0.0077 | 4.5310 0.0005  |
| $\nu_7 (a_2)$                | 0.0229 | 4.5326 0.0049  |
| $\nu_8 (a_2)$                | 0.0303 | 4.5310 0.0051  |
| $\nu_9 (b_1)$                | 0.0233 | 4.5305 0.0005  |
| $\nu_{10} (b_1)$             | 0.0337 | 4.5273 0.0153  |
| $\nu_{11} (b_1)$             | 0.0661 | 4.5294 0.0242  |
| $\nu_{12} (b_2)$             | 0.0098 | 4.5277 -0.0162 |
| $\nu_{13} (b_2)$             | 0.0132 | 4.511 -0.0124  |
| $\nu_{14} (b_2)$             | 0.0310 | 4.5297 0.0007  |
| $\nu_{15} (b_2)$             | 0.0650 | 4.2696 0.0536  |

Table S.VIII. Quadratic and higher-order coupling parameters for  $\tilde{F}^2B_2$  state. The parameters are given in the eV unit.

| Vibrational mode frequencies | $E_0$  | $\gamma$       |
|------------------------------|--------|----------------|
| $\nu_6 (a_2)$                | 0.0077 | 4.7526 -0.0004 |
| $\nu_7 (a_2)$                | 0.0229 | 4.7527 0.0096  |
| $\nu_8 (a_2)$                | 0.0303 | 4.7532 0.0142  |
| $\nu_9 (b_1)$                | 0.0233 | 4.7591 0.0276  |
| $\nu_{10} (b_1)$             | 0.0337 | 4.7534 0.0092  |
| $\nu_{11} (b_1)$             | 0.0661 | 4.7610 0.0298  |
| $\nu_{12} (b_2)$             | 0.0098 | 4.7541 0.0021  |
| $\nu_{13} (b_2)$             | 0.0132 | 4.7693 0.0289  |
| $\nu_{14} (b_2)$             | 0.0310 | 4.7541 0.0126  |
| $\nu_{15} (b_2)$             | 0.0650 | 4.7630 0.0237  |

Table S.IX. Normal modes combination, size of the primitive basis and single particle function (SPF) for uncoupled and coupled (TD and TI) calculations of  $\text{Al}_6\text{N}^-$  using the MCTDH approach.

| Combination of normal modes                            | Primitive basis | SPF                    |
|--------------------------------------------------------|-----------------|------------------------|
| $\nu_2$                                                | 8               | [12,12,12,12,12,12,12] |
| $\nu_1, \nu_3$                                         | 8,10            | [10,10,10,10,10,10,10] |
| $\nu_4$                                                | 10              | [9,9,9,9,9,9,9]        |
| $\nu_5$                                                | 8               | [7,7,7,7,7,7,7]        |
| $\nu_2, \nu_6, \nu_{12}, \nu_{13}$                     | 10,10,10,10     | [12,12,12,12,12,12,12] |
| $\nu_1, \nu_3, \nu_7, \nu_8, \nu_9$                    | 8,8,8,8,8,      | [10,10,10,10,10,10,10] |
| $\nu_5, \nu_{10}, \nu_{11}, \nu_{14}, \nu_{15}, \nu_4$ | 6,6,6,6,6,6     | [8,8,8,8,8,8,8]        |
| $\nu_2$                                                | 12              | [12,12,12,12,12,12,12] |
| $\nu_1, \nu_3$                                         | 8,10            | [10,10,10,10,10,10,10] |
| $\nu_4$                                                | 10              | [9,9,9,9,9,9,9]        |
| $\nu_5$                                                | 8               | [7,7,7,7,7,7,7]        |
| $\nu_2, \nu_6, \nu_{12}$                               | 8,8,8           | [6,6,6,6,6,6,6]        |
| $\nu_1, \nu_3, \nu_7, \nu_9$                           | 6,6,6,6         | [5,5,5,5,5,5,5]        |
| $\nu_5, \nu_4$                                         | 5,5             | [3,3,3,3,3,3,3]        |

Table S.X. Vibronic level assignments for fundamental and first overtone excitation (in  $\text{cm}^{-1}$ ) of tuning modes for  $\tilde{A}$  state.

| No. | Vibronic Energy Level | Assignments |
|-----|-----------------------|-------------|
| 1   | 0                     | 0           |
| 2   | 280                   | $\nu_1$     |
| 3   | 352                   | $\nu_2$     |
| 4   | 542                   | $\nu_3$     |
| 5   | 547                   | $\nu_4$     |
| 6   | 633                   | $\nu_5$     |
| 7   | 716                   | $2\nu_2$    |

Table S.XI. Vibronic level assignments for fundamental excitation (in  $\text{cm}^{-1}$ ) of tuning modes for  $\tilde{B}$  state.

| No. | Vibronic Energy Level | Assignments |
|-----|-----------------------|-------------|
| 1   | 0                     | 0           |
| 2   | 261                   | $\nu_1$     |
| 3   | 683                   | $\nu_2$     |
| 4   | 808                   | $\nu_3$     |
| 5   | 915                   | $\nu_4$     |
| 6   | 924                   | $\nu_5$     |

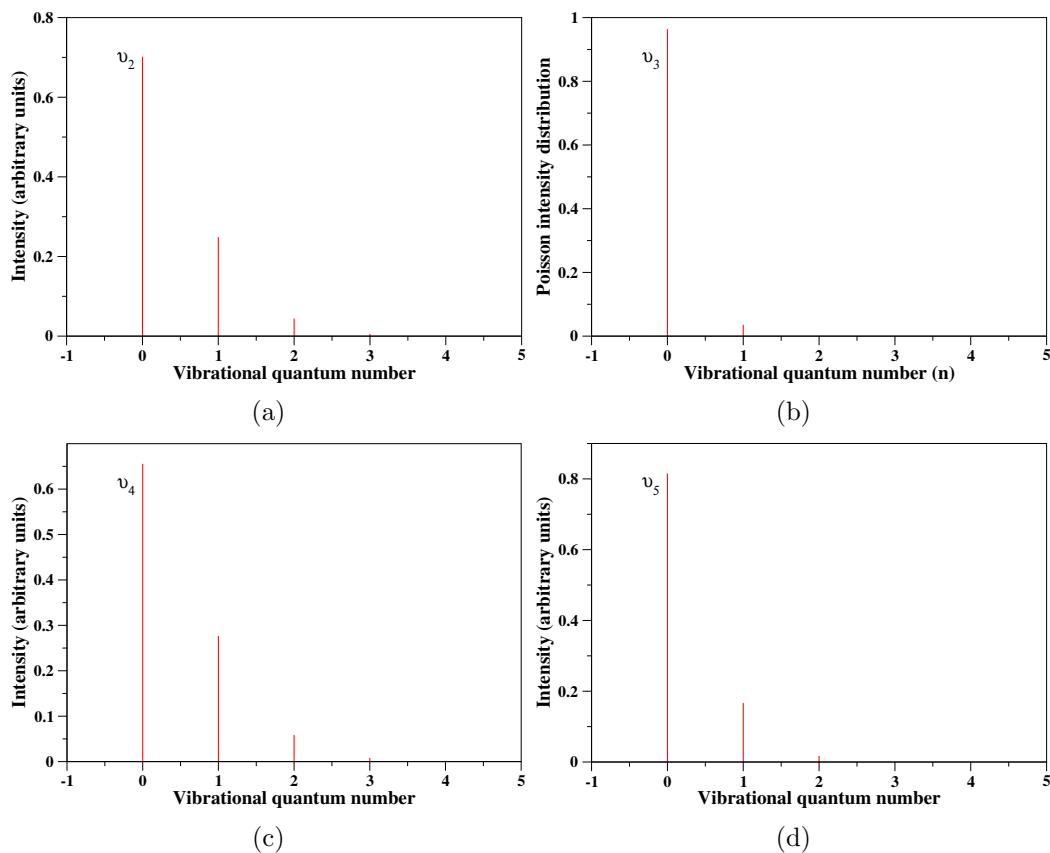

Figure S2. Poisson intensity distribution for tuning vibrational modes of  $\tilde{X}^2B_1$  electronic state of  $Al_6N$  along vibrational quantum number.

Table S.XII. Vibronic level assignments for fundamental excitation (in  $cm^{-1}$ ) of tuning modes for  $\tilde{C}$  state.

| No. | Vibronic Energy | Level | Assignments |
|-----|-----------------|-------|-------------|
| 1   | 0               | 0     | 0           |
| 2   | 551             |       | $\nu_2$     |
| 3   | 693             |       | $\nu_4$     |

Table S.XIII. Vibronic level assignments for fundamental excitation (in  $cm^{-1}$ ) of tuning modes for  $\tilde{D}$  state.

| No. | Vibronic Energy | Level | Assignments |
|-----|-----------------|-------|-------------|
| 1   | 0               | 0     | 0           |
| 2   | 473             |       | $\nu_2$     |
| 3   | 547             |       | $\nu_3$     |

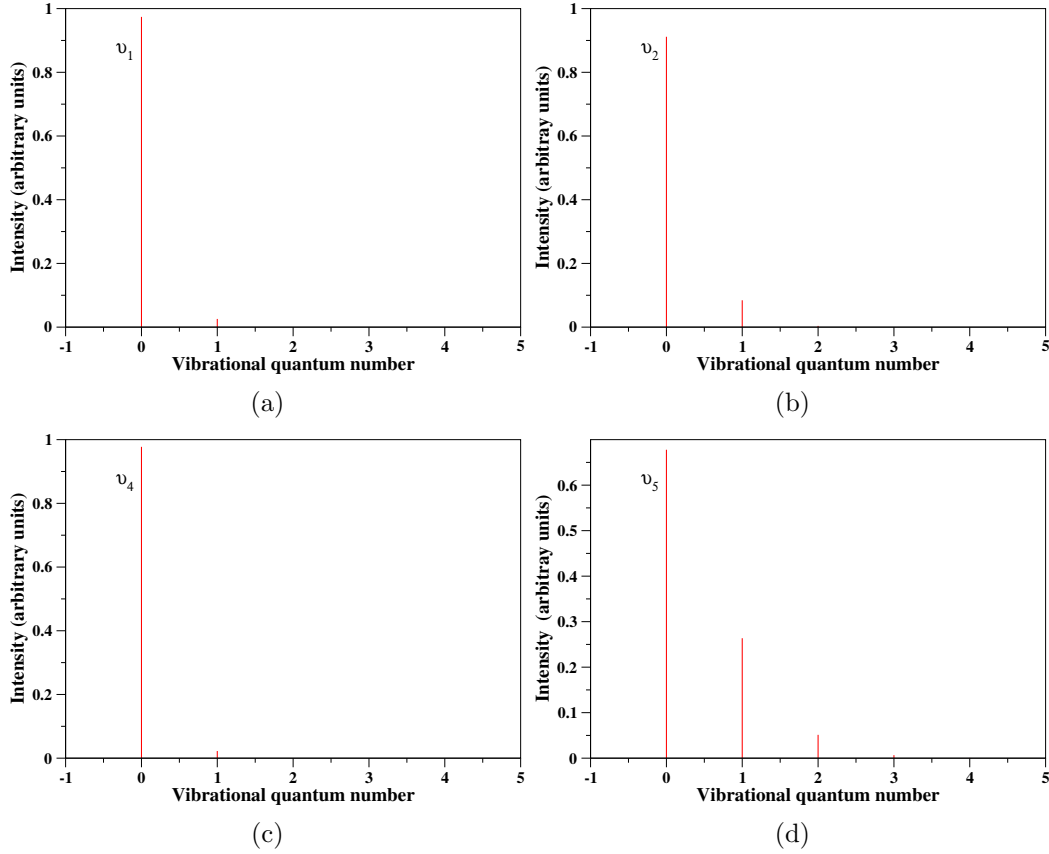

Figure S3. Poisson intensity distribution for tuning vibrational modes of  $\tilde{A}^2A_1$  electronic state of  $\text{Al}_6\text{N}$  along vibrational quantum number.

Table S.XIV. Vibronic level assignments for fundamental excitation (in  $\text{cm}^{-1}$ ) of tuning modes for  $\tilde{E}$  state.

| No. | Vibronic Energy Level | Assignments |
|-----|-----------------------|-------------|
| 1   | 0                     | 0           |
| 2   | 545                   | $\nu_2$     |
| 3   | 984                   | $\nu_5$     |

Table S.XV. Vibronic level assignments for fundamental excitation (in  $\text{cm}^{-1}$ ) of tuning modes for  $\tilde{F}$  state.

| No. | Vibronic Energy Level | Assignments |
|-----|-----------------------|-------------|
| 1   | 0                     | 0           |
| 2   | 208                   | $\nu_1$     |
| 3   | 358                   | $\nu_3$     |
| 4   | 488                   | $\nu_4$     |
| 5   | 538                   | $\nu_5$     |



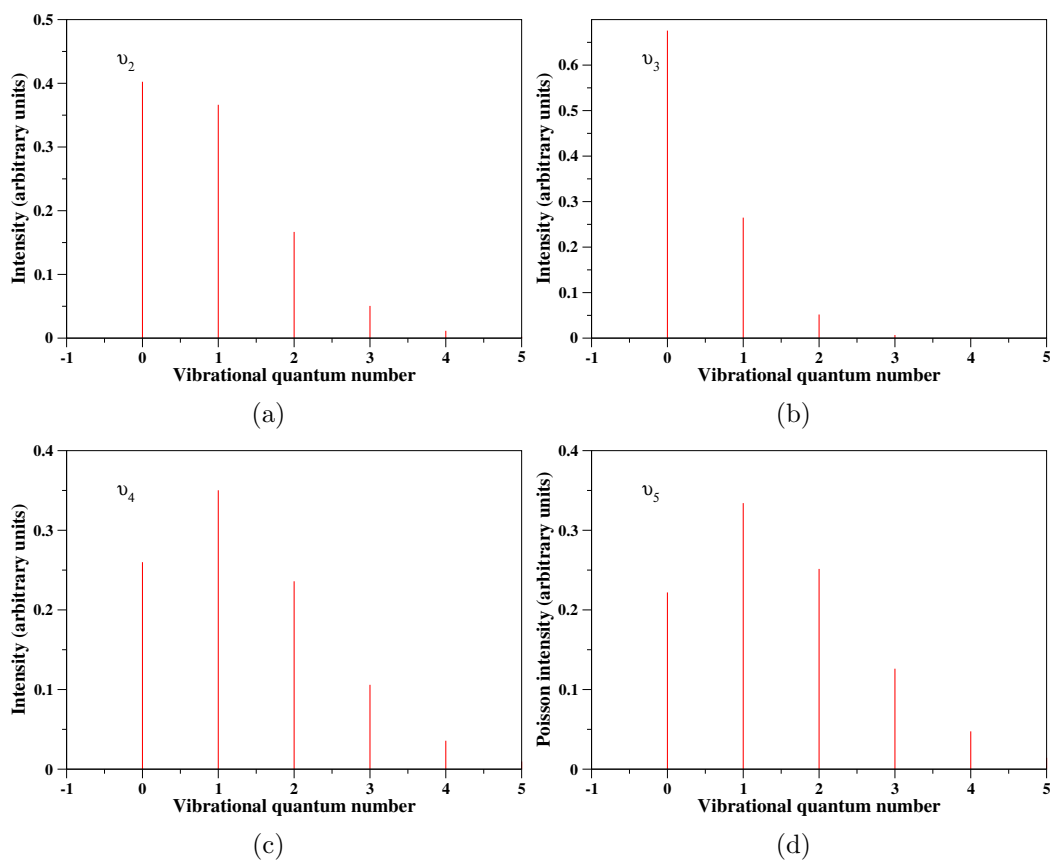

Figure S4. Poisson intensity distribution for tuning vibrational modes of  $\tilde{B}^2B_2$  electronic state of  $Al_6N$  along vibrational quantum number.

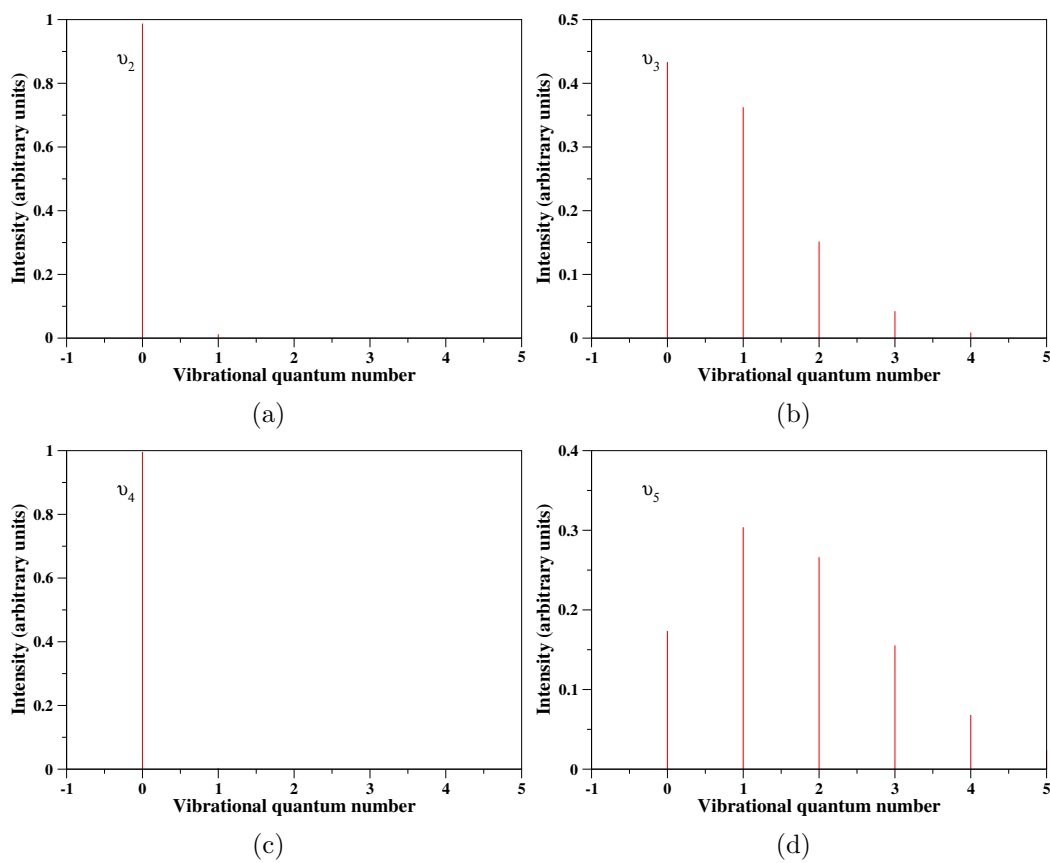

Figure S5. Poisson intensity distribution for tuning modes of  $\tilde{C}^2A_2$  electronic state of  $Al_6N$  along vibrational quantum number.

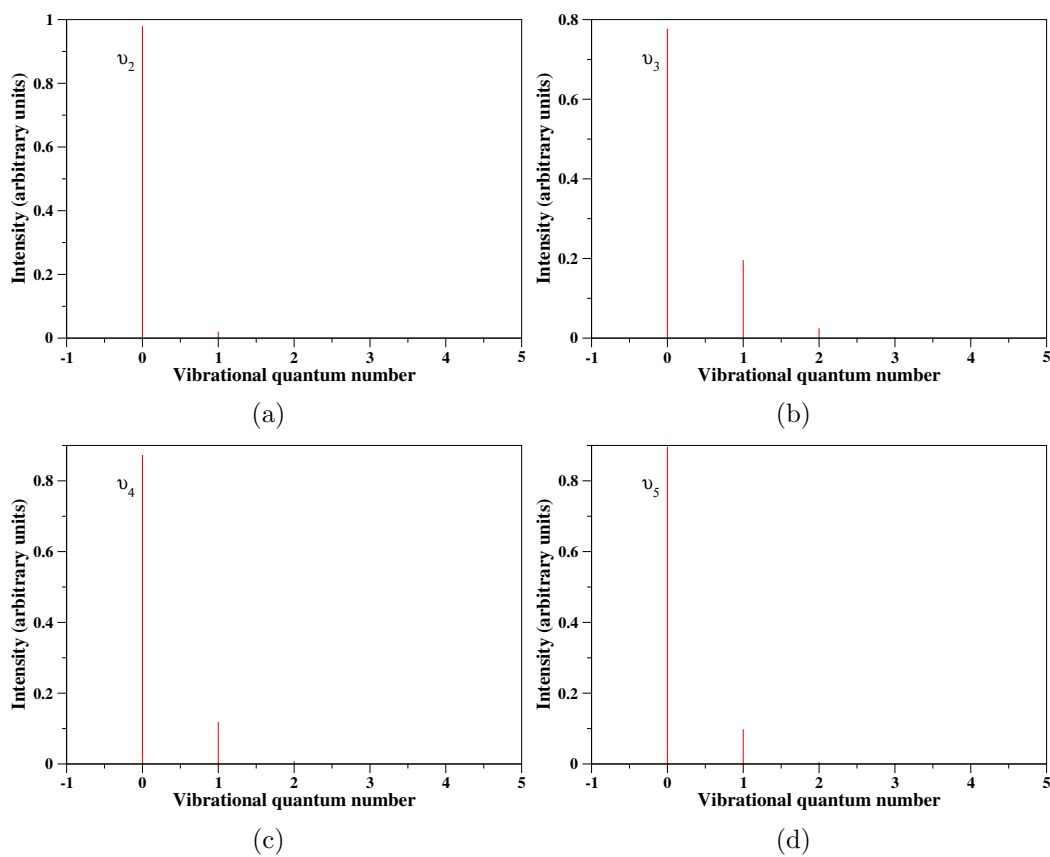

Figure S6. Poisson intensity distribution for tuning modes of  $\tilde{D}^2B_1$  electronic state of  $Al_6N$  along vibrational quantum number.

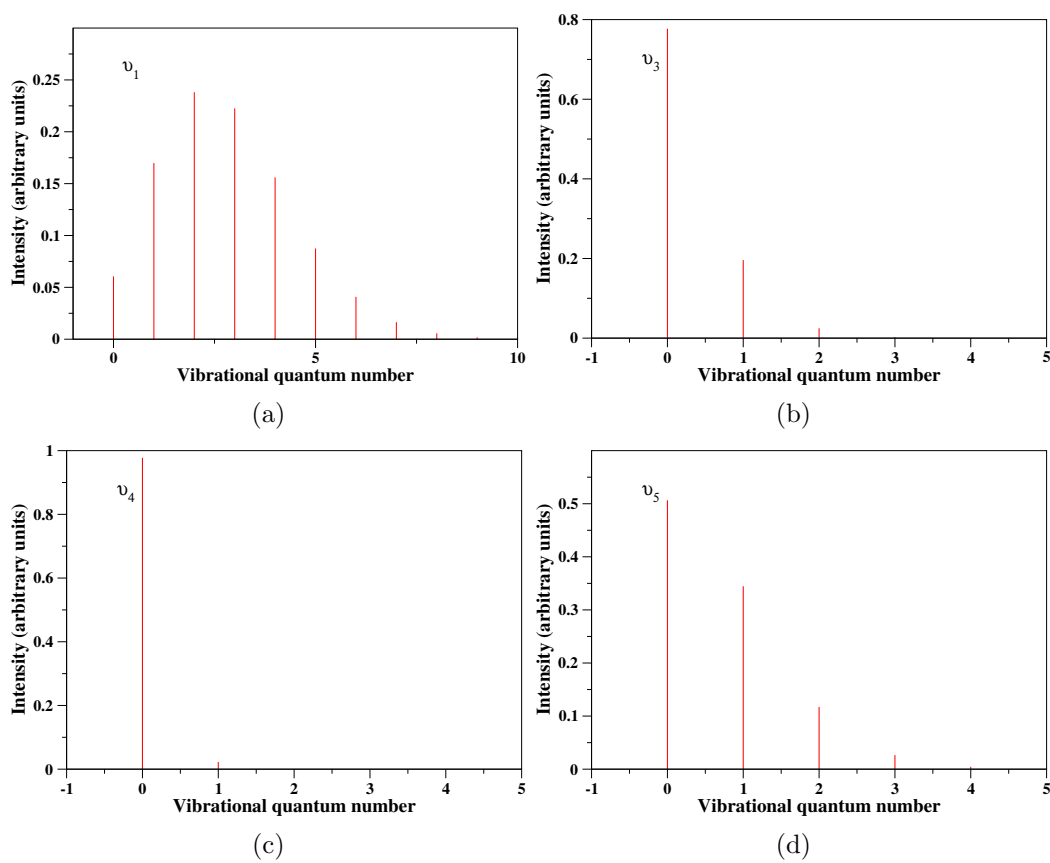

Figure S7. Poisson intensity distribution for tuning modes of  $\tilde{E}^2A_1$  electronic state of  $Al_6N$  along vibrational quantum number.

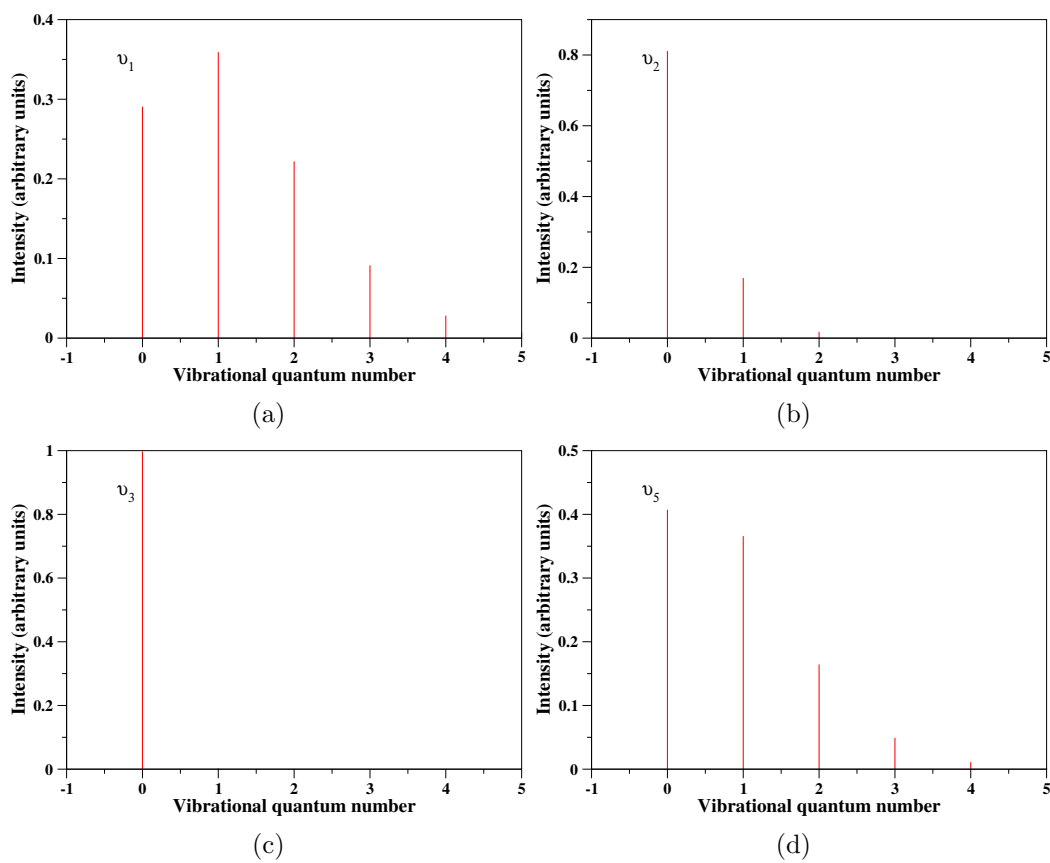

Figure S8. Poisson intensity distribution for tuning modes of  $\tilde{F}^2B_2$  electronic state of  $\text{Al}_6\text{N}$  along vibrational quantum number.

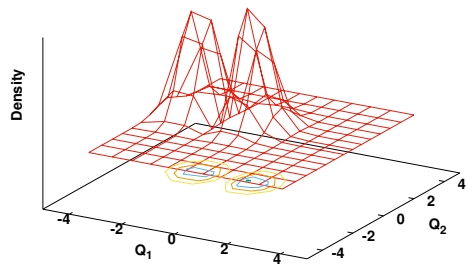(a) 280 cm<sup>-1</sup>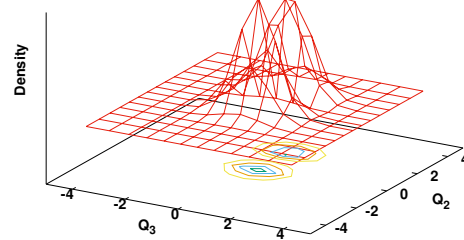(b) 352 cm<sup>-1</sup>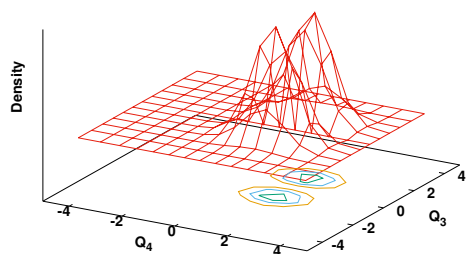(c) 542 cm<sup>-1</sup>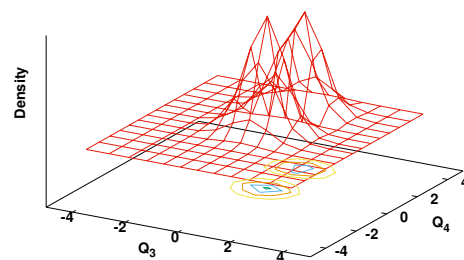(d) 547 cm<sup>-1</sup>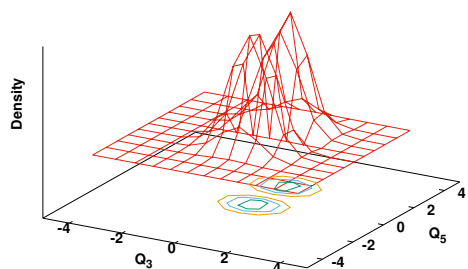(e) 633 cm<sup>-1</sup>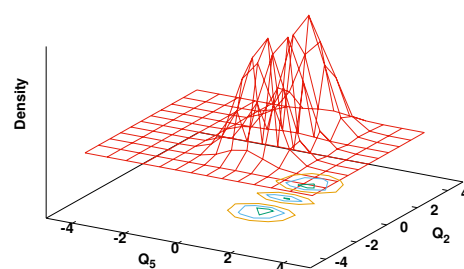(f) 716 cm<sup>-1</sup>

Figure S9. WP density plot for assignment of fundamental and first overtone of corresponding tuning modes for ground electronic state  $\tilde{A}$ .

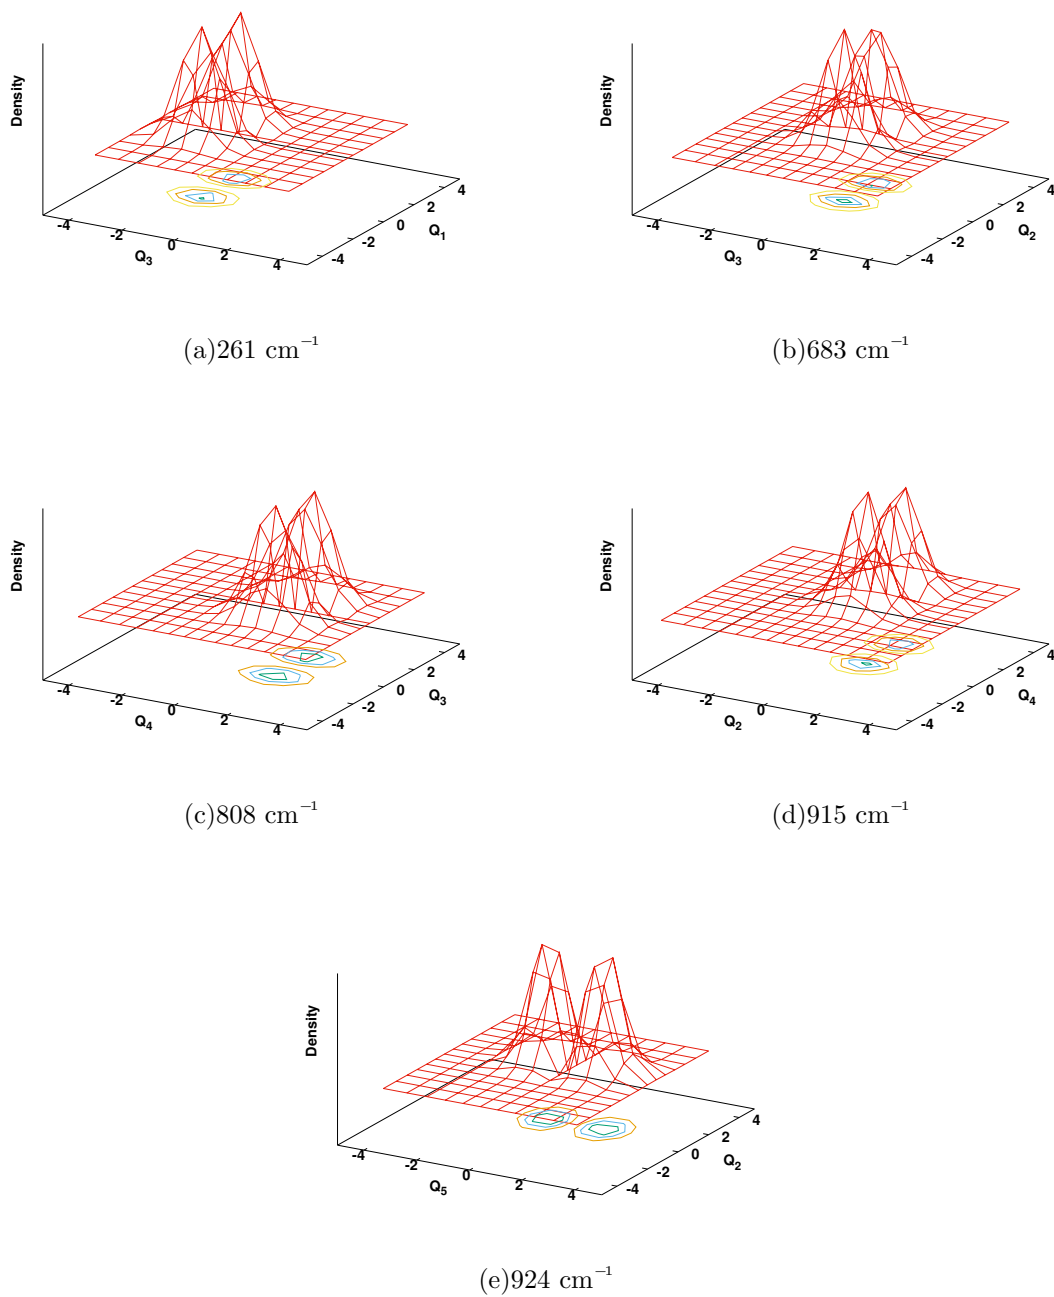

Figure S10. WP density plot for assignment of fundamental bands of corresponding tuning modes for  $\tilde{B}$  state.

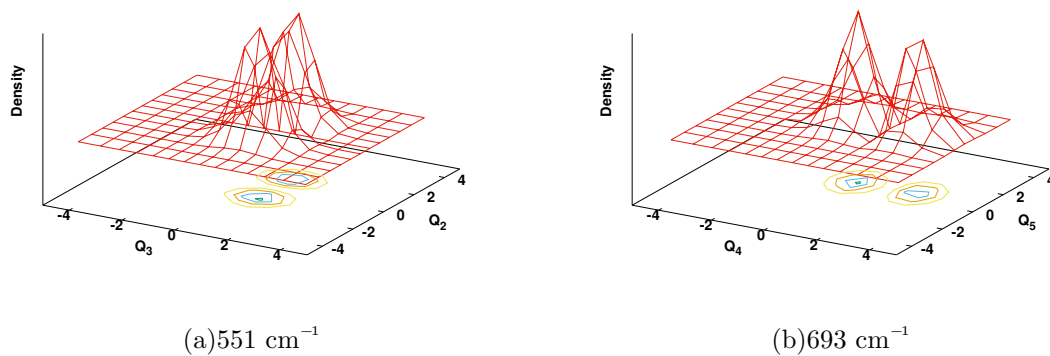

Figure S11. WP density plot for assignment of fundamental bands of corresponding tuning modes for  $\tilde{C}$  state.

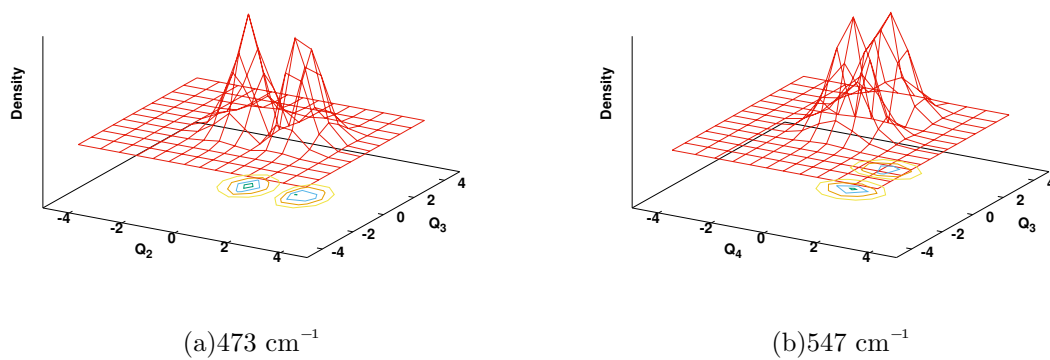

Figure S12. WP density plot for assignment of fundamental bands of corresponding tuning modes for  $\tilde{D}$  state.



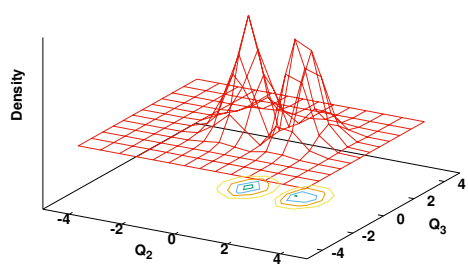(a) 545 cm<sup>-1</sup>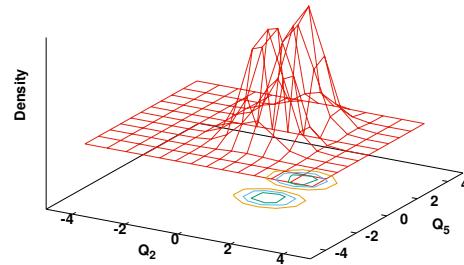(b) 984 cm<sup>-1</sup>

Figure S13. WP density plot for assignment of fundamental bands of corresponding tuning modes for  $\tilde{E}$  state.

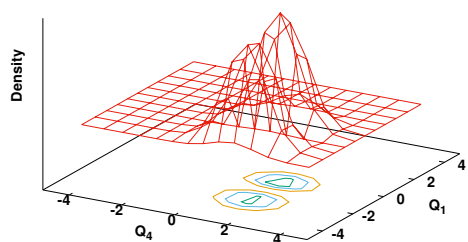(a) 208 cm<sup>-1</sup>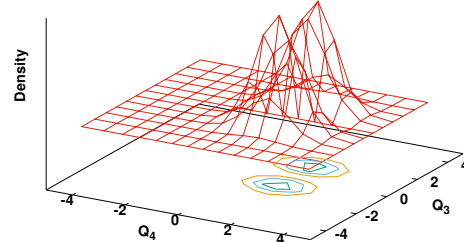(b) 358 cm<sup>-1</sup>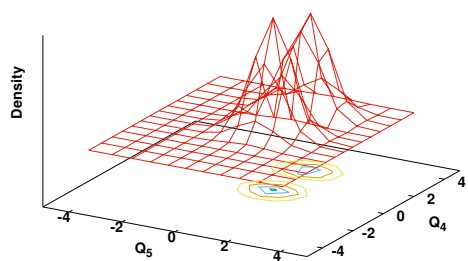(c) 488 cm<sup>-1</sup>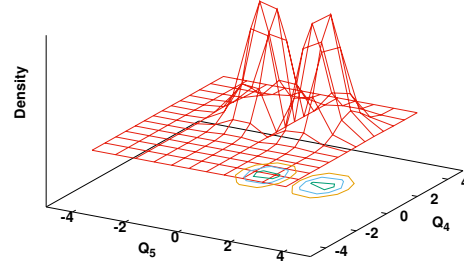(d) 538 cm<sup>-1</sup>

Figure S14. WP density plot for assignment of fundamental bands of corresponding tuning modes for  $\tilde{F}$  state.

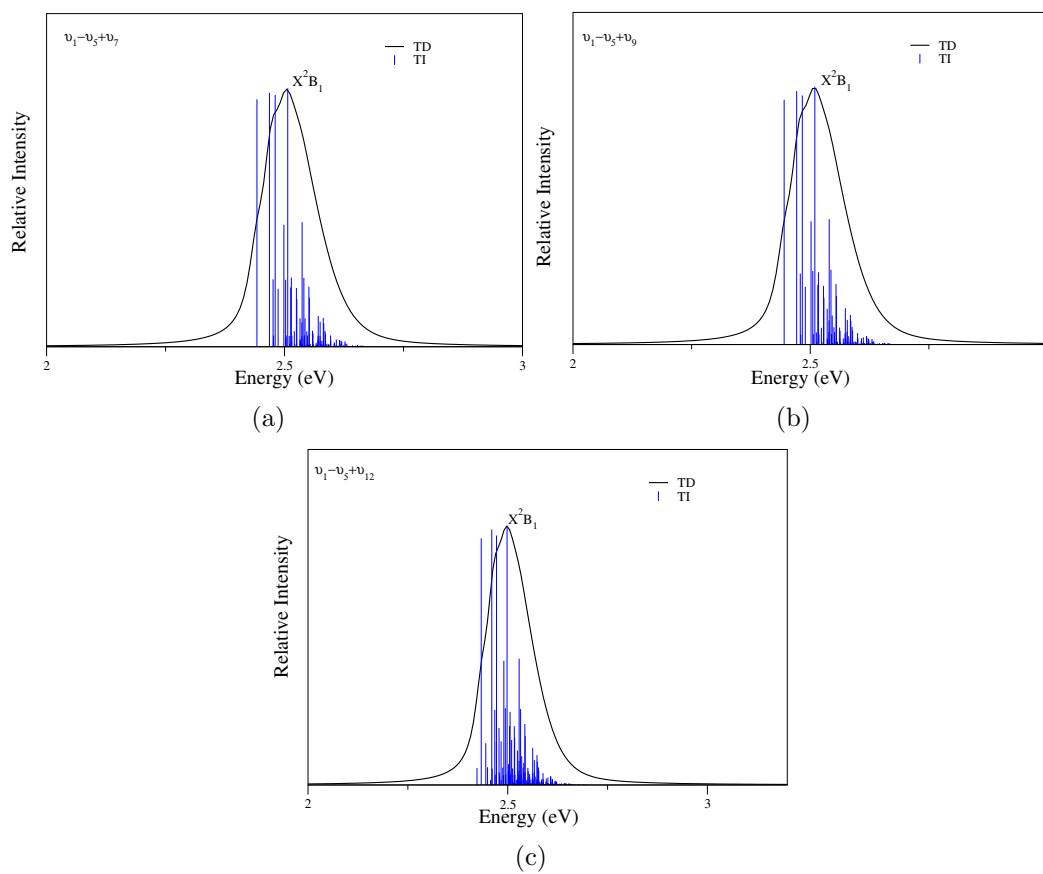

Figure S15. Comparison of TD and TI spectra for  $\tilde{X}^2B_1$  electronic state including  $\nu_6$ ,  $\nu_7$ ,  $\nu_9$  and  $\nu_{12}$  vibrational modes along with totally symmetric vibrational modes for  $Al_6N$ .

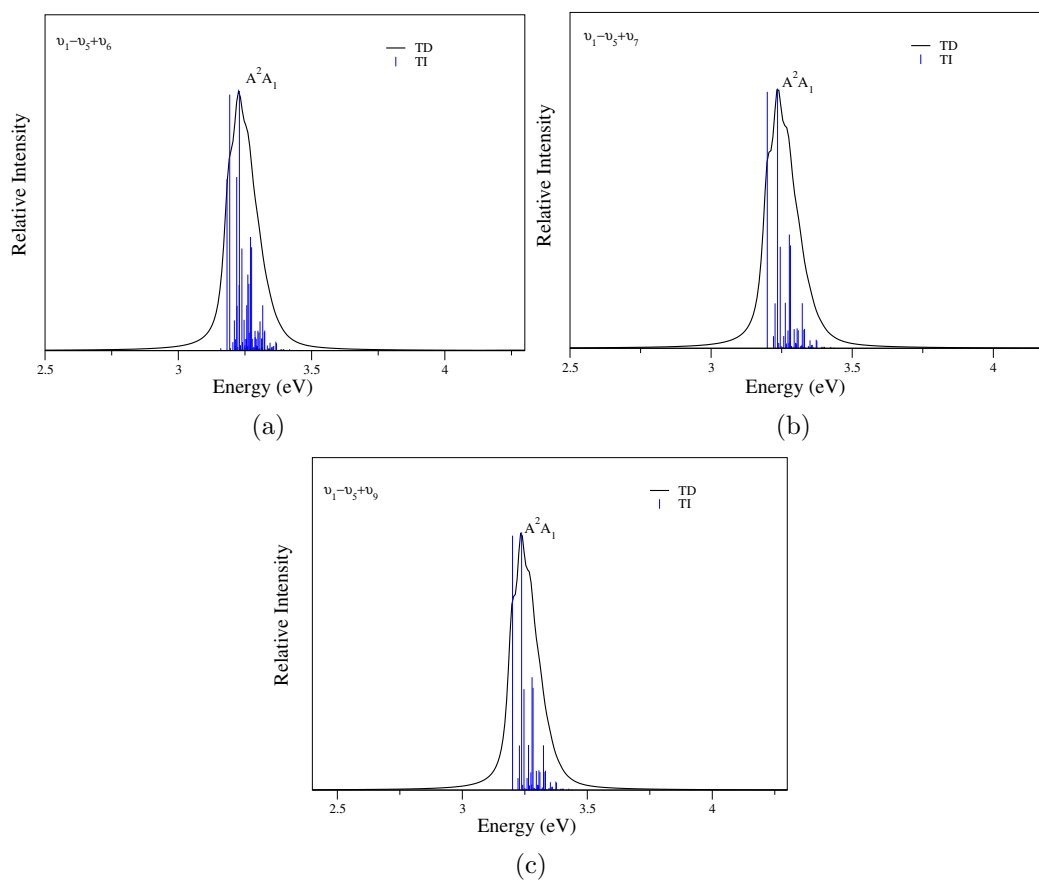

Figure S16. Comparison of TD and TI spectra for  $\tilde{A}^2A_1$  electronic state including  $\nu_6$ ,  $\nu_7$  and  $\nu_9$  vibrational mode along with totally symmetric vibrational modes for  $Al_6N$ .

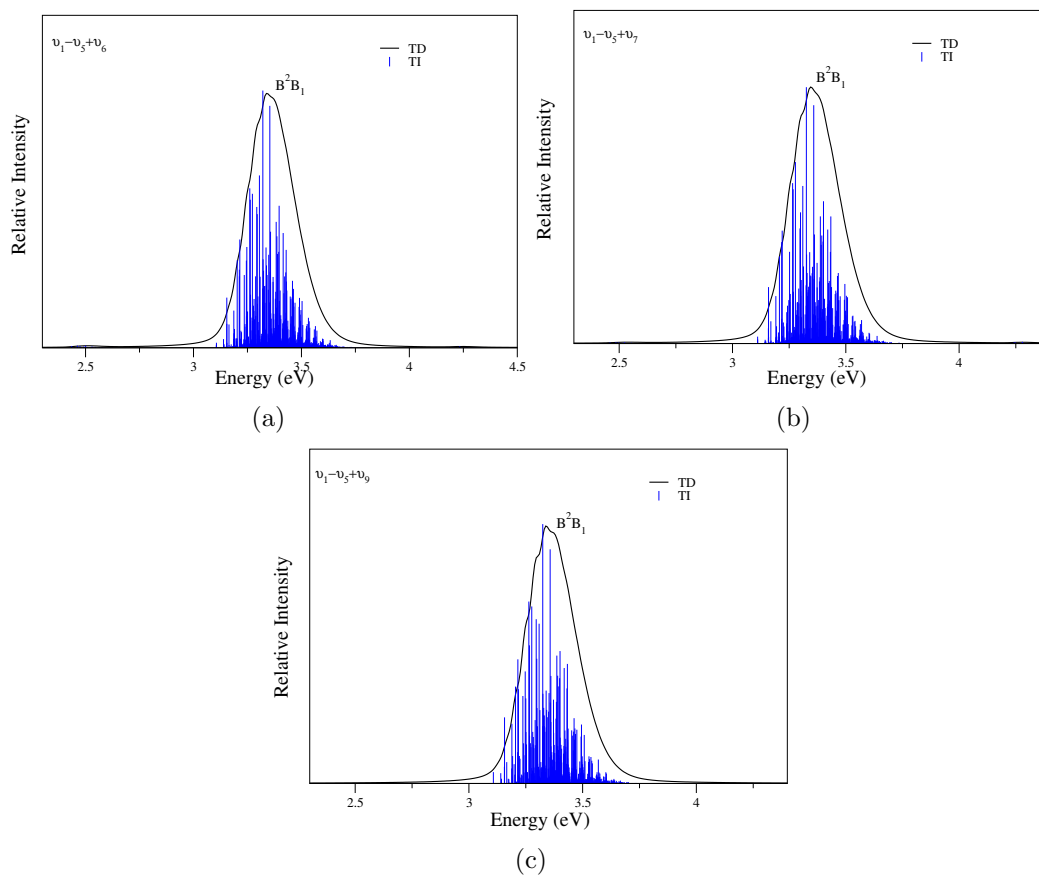

Figure S17. Comparison of TD and TI spectra for  $\tilde{B}^2B_2$  electronic state including  $\nu_6$ ,  $\nu_7$  and  $\nu_9$  vibrational mode along with totally symmetric vibrational modes for  $Al_6N$ .

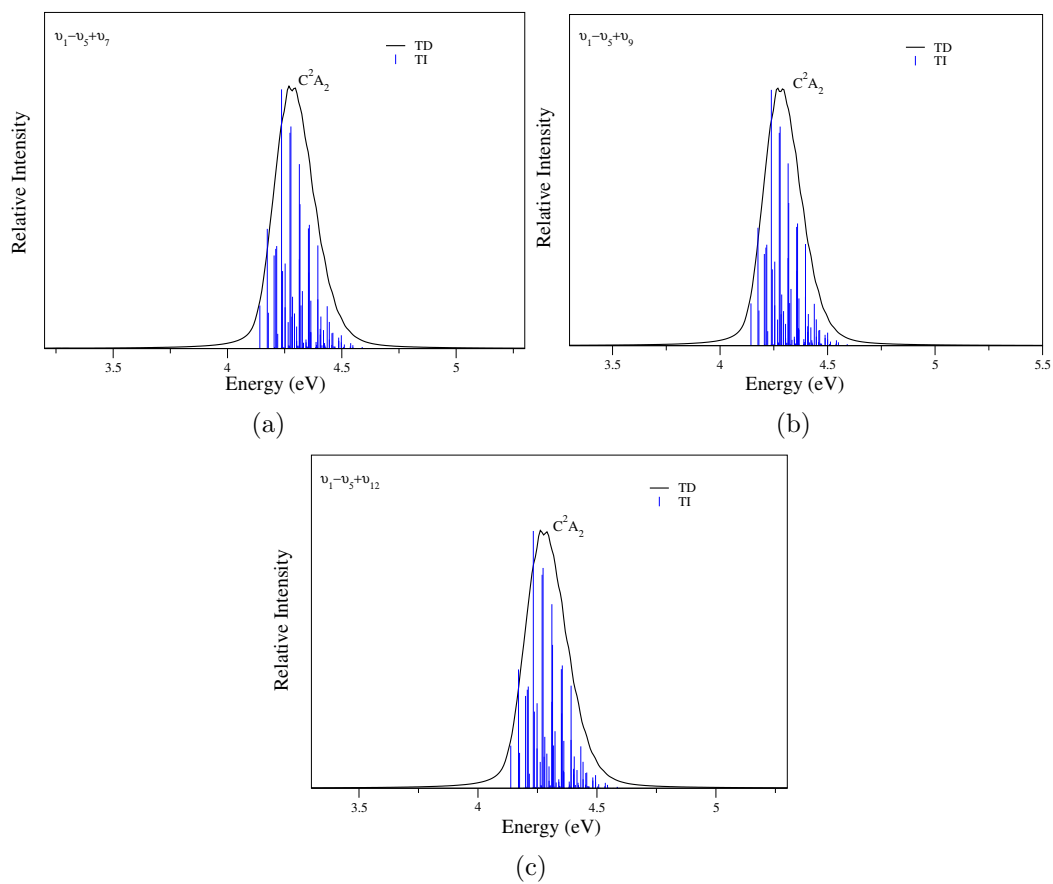

Figure S18. Comparison of TD and TI spectra for  $\tilde{C}^2A_2$  electronic state including  $\nu_6$ ,  $\nu_7$ ,  $\nu_9$  and  $\nu_{12}$  vibrational mode along with totally symmetric vibrational modes for  $Al_6N$ .

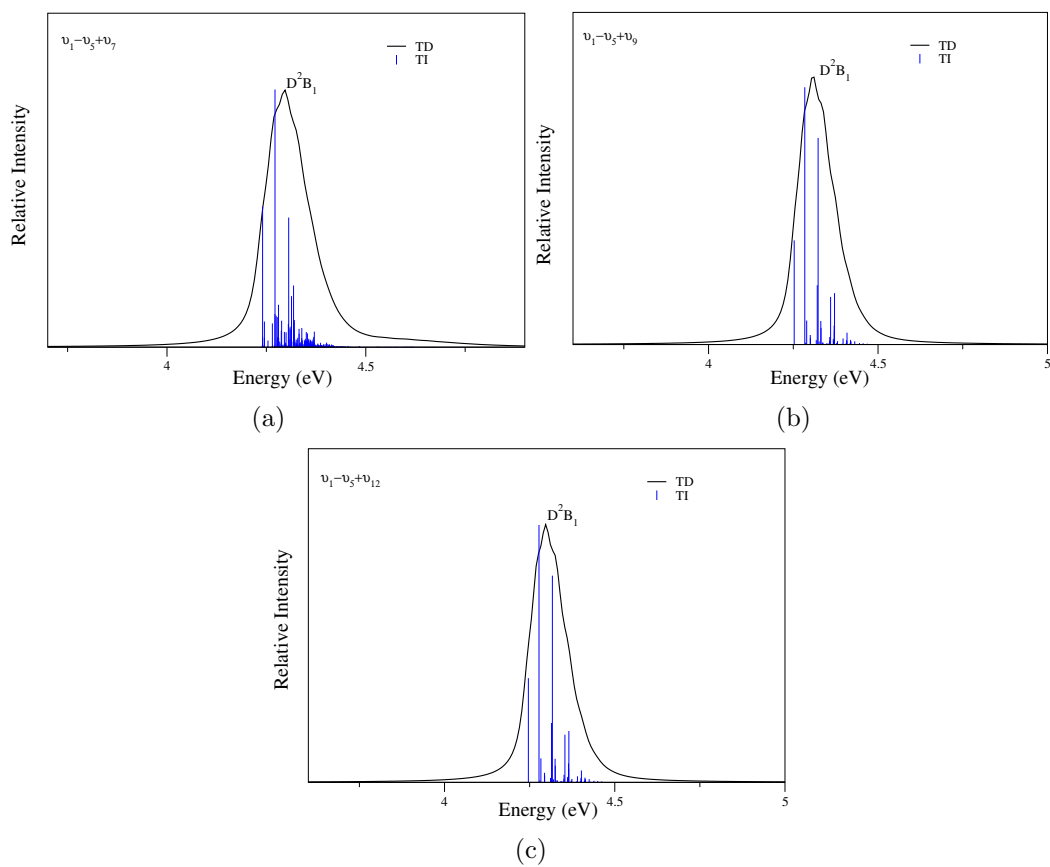

Figure S19. Comparison of TD and TI spectra for  $\tilde{D}^2B_1$  electronic state including  $\nu_9$  and  $\nu_{12}$  vibrational mode along with totally symmetric vibrational modes for  $Al_6N$ .

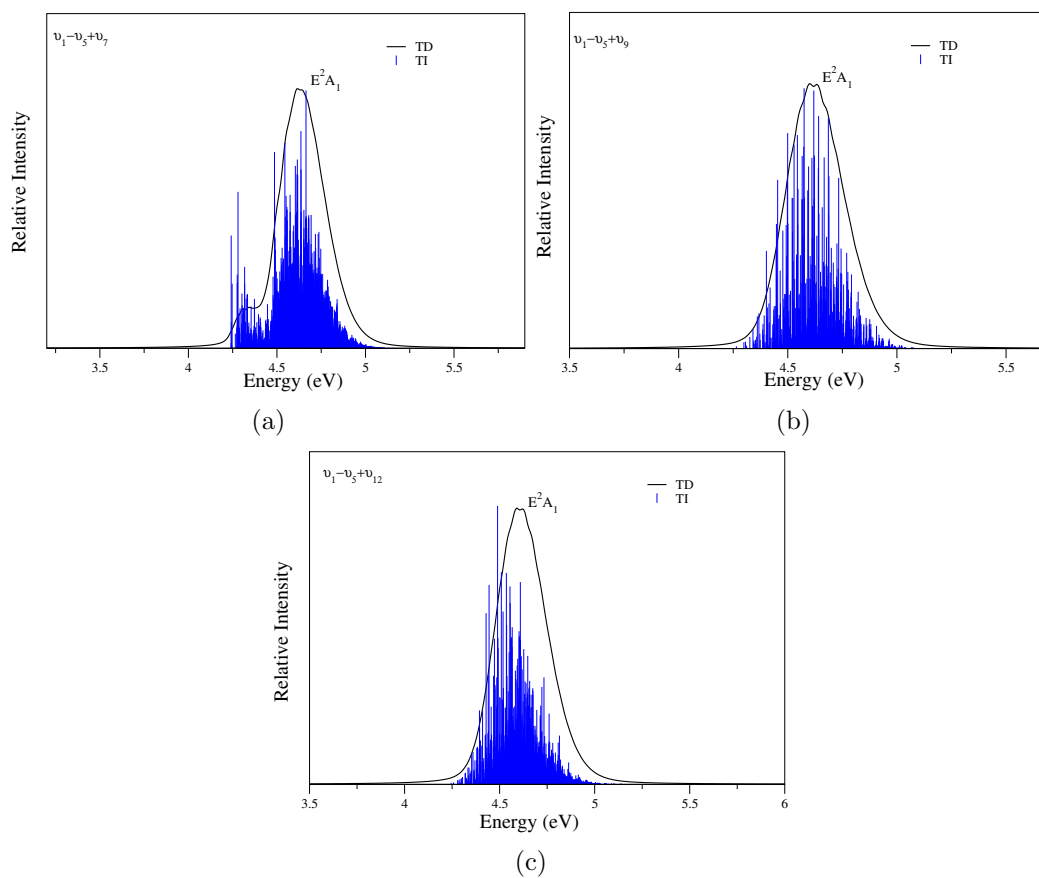

Figure S20. Comparison of TD and TI spectra for  $\tilde{E}^2A_1$  electronic state including  $\nu_9$  and  $\nu_{12}$  vibrational mode along with totally symmetric vibrational modes for  $Al_6N$ .

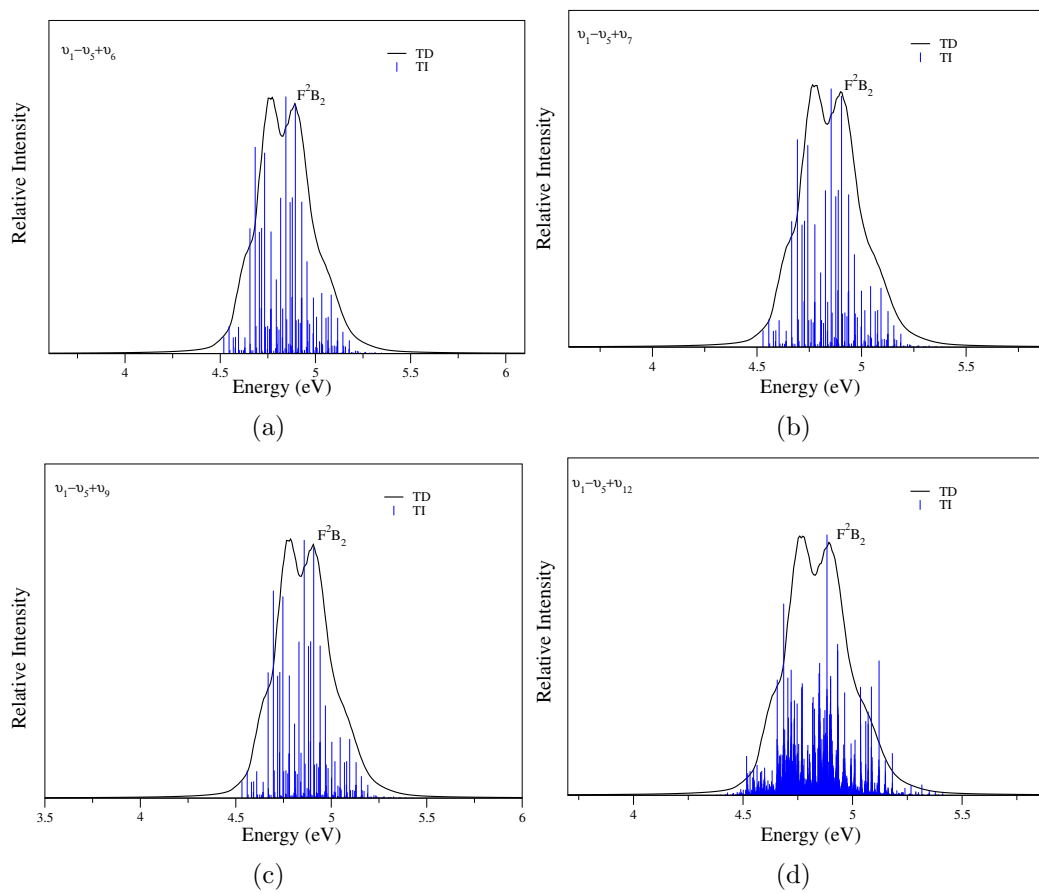

Figure S21. Comparison of TD and TI spectra for  $\tilde{F}^2B_2$  electronic state including  $\nu_6$ ,  $\nu_7$ ,  $\nu_9$  and  $\nu_{12}$  vibrational mode along with totally symmetric vibrational modes for  $\text{Al}_6\text{N}$ .
